# Supplementary material for: Implementation of the biogenic emission model MEGAN(v2.1) intothe ECHAM6-HAMMOZ chemistry climate model. Basic resultsand sensitivity tests
Source: Copernicus journal article supplement (doi:10.5194/gmd-2016-248), 2016-10-04
Supplement: Supplementary file 1 [file gmd-2016-248-supplement.pdf]

## S1 Emission activity factor parameterizations

The activity factor for LAI,  $\gamma_{LAI}$ , is calculated as

$$\gamma_{LAI} = \frac{0.49LAI}{(1 + 0.2LAI^2)^{0.5}} \quad (S1)$$

where  $LAI$  is the leaf area index ( $m^2 m^{-2}$ ) computed by JSBACH and averaged over the vegetated part of the grid cell.

5 The activity factor for light  $\gamma_P$  is calculated as follows

$$\gamma_P = 0 \quad a < 0, a > 180 \quad (S2)$$

$$\gamma_P = \sin(a) [2.46(1 + 0.0005(P_{24} - 400))\Phi - 0.9\Phi^2] \quad 0 < a < 180 \quad (S3)$$

10 where  $P_{24}$  is the average surface PPFD over the last 24 hours ( $\mu\text{mol}$  of photons in 400-700 nm range  $m^{-2} s^{-1}$ ),  $a$  is the solar angle (degrees) and  $\Phi$  is the above canopy PPFD transmission (non-dimensional) estimated as  $\Phi = P/P_{toa}$ , with  $P$  the surface PPFD at current time step and  $P_{toa}$  the PPFD at the top of the atmosphere adjusted for solar angle.

The light dependent activity factor for temperature  $\gamma_{TLD}$  is estimated as

$$\gamma_{TLD} = \frac{E_{opt}C_{T2} \exp(C_{T1}x)}{(C_{T2} - C_{T1}(1 - \exp(C_{T2}x)))} \quad (S4)$$

where

$$x = [(1/T_{opt}) - (1/T)]/0.00831 \quad (S5)$$

$$15 \quad T_{opt} = 313 + 0.6(T_{24} - T_S) \quad (S6)$$

$$E_{opt} = C_{eo} \exp(0.08(T_{24} - T_S)) \quad (S7)$$

$$(S8)$$

20 with  $T$  the lowest atmospheric model level temperature at the current time step (K),  $T_{24}$  the average temperature at the same level over the last 24 hours (K) and  $T_S$  the leaf temperature in standard condition (= 297 K).  $C_{T1}$  and  $C_{eo}$  are emission-class empirical coefficients given for each compound in Table S1 in Section S2.  $C_{T2}$  is an empirical coefficient (= 200).

The light independent activity factor for temperature  $\gamma_{TLI}$  is estimated as

$$\gamma_{TLI} = \exp(\beta(T - T_S)) \quad (S9)$$

where  $\beta$  is an empirical coefficient specific of each compound class (see Table S1) and  $T_S$  the leaf temperature in standard condition (= 297 K).

25 The soil moisture activity factor  $\gamma_{SM}$  is calculated as

$$\gamma_{SM} = 1 \quad \Theta > \Theta_1 \quad (S10)$$

$$\gamma_{SM} = (\Theta - \Theta_W)/\Delta\Theta_1 \quad \Theta_W < \Theta < \Theta_1 \quad (S11)$$

$$\gamma_{SM} = 0 \quad \Theta < \Theta_W \quad (S12)$$

$$(S13)$$

30 where  $\Theta$  is the volumetric water content ( $m^3 m^{-3}$ ),  $\Theta_W$  is wilting point (i. e., the soil moisture limit below which plants cannot extract water from soil,  $m^3 m^{-3}$ ),  $\Theta_1$  is defined as  $\Theta_W - \Delta\Theta_1$  with the empirical parameter  $\Delta\Theta_1=0.06$  (Guenther et al., 2006).

## S2 Compound specific parameters

**Table S1.** Compound-class specific model parameters for the calculation of light and temperature activity factor

| Compound Classes       | LDF | $C_{T1}$ | $C_{eo}$ | $\beta$ |
|------------------------|-----|----------|----------|---------|
| isoprene               | 1   | 95       | 2        | -       |
| myrcene                | 0.6 | 80       | 1.83     | 0.1     |
| sabinene               | 0.6 | 80       | 1.83     | 0.1     |
| limonene               | 0.2 | 80       | 1.83     | 0.1     |
| 3-carene               | 0.2 | 80       | 1.83     | 0.1     |
| t- $\beta$ -ocimene    | 0.8 | 80       | 1.83     | 0.1     |
| $\alpha$ -pinene       | 0.6 | 80       | 1.83     | 0.1     |
| $\beta$ -pinene        | 0.2 | 80       | 1.83     | 0.1     |
| $\beta$ -caryophyllene | 0.5 | 130      | 2.37     | 0.17    |
| 232-MBO                | 1   | 95       | 2        | -       |
| methanol               | 0.8 | 60       | 1.6      | 0.08    |
| acetone                | 0.2 | 80       | 1.83     | 0.1     |
| carbon monoxide        | 1   | 60       | 1.6      | -       |
| nitric oxide           | 0   | -        | -        | 0.1     |
| bidirectional VOCs     | 0.8 | 95       | 2        | 0.13    |
| stress VOCs            | 0.8 | 80       | 1.83     | 0.1     |
| other VOCs             | 0.2 | 80       | 1.83     | 0.1     |

### S3 Compound specific emission factor for the MEGAN2.1-CLM4 15-PFTs

**Table S2.** Compound specific emission factor for each of the 15 PFTs of the MEGANv2.1-CLM4 scheme ( $\mu\text{g m}^{-2} \text{h}^{-1}$ ).

| Compound Names         | €1   | €2   | €3   | €4   | €5    | €6   | €7    | €8    | €9   | €10  | €11  | €12  | €13  | €14  | €15  |
|------------------------|------|------|------|------|-------|------|-------|-------|------|------|------|------|------|------|------|
| isoprene               | 600  | 3000 | 1    | 7000 | 10000 | 7000 | 10000 | 11000 | 2000 | 4000 | 4000 | 1600 | 800  | 200  | 1    |
| myrcene                | 70   | 70   | 60   | 80   | 30    | 80   | 30    | 30    | 30   | 50   | 30   | 0.3  | 0.3  | 0.3  | 0.3  |
| sabinene               | 70   | 70   | 40   | 80   | 50    | 80   | 50    | 50    | 50   | 70   | 50   | 0.7  | 0.7  | 0.7  | 0.7  |
| limonene               | 100  | 100  | 130  | 80   | 80    | 80   | 80    | 80    | 60   | 100  | 60   | 0.7  | 0.7  | 0.7  | 0.7  |
| 3-carene               | 160  | 160  | 80   | 40   | 30    | 40   | 30    | 30    | 30   | 100  | 30   | 0.3  | 0.3  | 0.3  | 0.3  |
| t- $\beta$ -ocimene    | 70   | 70   | 60   | 150  | 120   | 150  | 120   | 120   | 90   | 150  | 90   | 2    | 2    | 2    | 2    |
| $\alpha$ -pinene       | 500  | 500  | 510  | 600  | 400   | 600  | 400   | 400   | 200  | 300  | 200  | 2    | 2    | 2    | 2    |
| $\beta$ -pinene        | 300  | 300  | 200  | 120  | 130   | 120  | 130   | 130   | 100  | 150  | 100  | 1.5  | 1.5  | 1.5  | 1.5  |
| $\beta$ -caryophyllene | 80   | 80   | 80   | 60   | 40    | 60   | 40    | 40    | 50   | 50   | 50   | 1    | 1    | 1    | 4    |
| 232-MBO                | 700  | 60   | 0.01 | 0.01 | 0.01  | 0.01 | 2     | 0.01  | 0.01 | 0.01 | 0.01 | 0.01 | 0.01 | 0.01 | 0.01 |
| methanol               | 900  | 900  | 900  | 500  | 900   | 500  | 900   | 900   | 900  | 900  | 900  | 500  | 500  | 500  | 900  |
| acetone                | 240  | 240  | 240  | 240  | 240   | 240  | 240   | 240   | 240  | 240  | 240  | 80   | 80   | 80   | 80   |
| carbon monoxide        | 600  | 600  | 600  | 600  | 600   | 600  | 600   | 600   | 600  | 600  | 600  | 600  | 600  | 600  | 600  |
| nitric oxide           | 0    | -    | -    | 0.1  |       |      |       |       |      |      |      |      |      |      |      |
| ethanol                | 200  | 200  | 200  | 200  | 200   | 200  | 200   | 200   | 200  | 200  | 20   | 20   | 20   | 20   | 20   |
| acetaldehyde           | 200  | 200  | 200  | 200  | 200   | 200  | 200   | 200   | 200  | 200  | 20   | 20   | 20   | 20   | 20   |
| formaldehyde           | 40   | 40   | 40   | 40   | 40    | 40   | 40    | 40    | 40   | 40   | 16   | 16   | 16   | 16   | 16   |
| acetic acid            | 30   | 30   | 30   | 30   | 30    | 30   | 30    | 30    | 30   | 30   | 12   | 12   | 12   | 12   | 12   |
| formic acid            | 30   | 30   | 30   | 30   | 30    | 30   | 30    | 30    | 30   | 30   | 12   | 12   | 12   | 12   | 12   |
| ethene                 | 174  | 174  | 174  | 174  | 174   | 174  | 174   | 174   | 174  | 174  | 174  | 174  | 174  | 174  | 174  |
| hydrogen cyanide       | 4.5  | 4.5  | 4.5  | 4.5  | 4.5   | 4.5  | 4.5   | 4.5   | 4.5  | 4.5  | 4.5  | 4.5  | 4.5  | 4.5  | 4.5  |
| toluene                | 9    | 9    | 9    | 9    | 9     | 9    | 9     | 9     | 9    | 9    | 9    | 9    | 9    | 9    | 9    |
| methyl bromide         | 2.8  | 2.8  | 2.8  | 2.8  | 2.8   | 2.8  | 2.8   | 2.8   | 2.8  | 2.8  | 2.8  | 2.8  | 2.8  | 2.8  | 2.8  |
| methyl chloride        | 1.4  | 1.4  | 1.4  | 1.4  | 1.4   | 1.4  | 1.4   | 1.4   | 1.4  | 1.4  | 1.4  | 1.4  | 1.4  | 1.4  | 1.4  |
| methyl iodide          | 0.14 | 0.14 | 0.14 | 0.14 | 0.14  | 0.14 | 0.14  | 0.14  | 0.14 | 0.14 | 0.14 | 0.14 | 0.14 | 0.14 | 0.14 |
| dimethyl sulfide       | 0.42 | 0.42 | 0.42 | 0.42 | 0.42  | 0.42 | 0.42  | 0.42  | 0.42 | 0.42 | 0.42 | 0.42 | 0.42 | 0.42 | 0.42 |
| methane                | 0.7  | 0.7  | 0.7  | 0.7  | 0.7   | 0.7  | 0.7   | 0.7   | 0.7  | 0.7  | 0.7  | 0.7  | 0.7  | 0.7  | 0.7  |
| ethane                 | 1.4  | 1.4  | 1.4  | 1.4  | 1.4   | 1.4  | 1.4   | 1.4   | 1.4  | 1.4  | 1.4  | 1.4  | 1.4  | 1.4  | 1.4  |
| propane                | 0.14 | 0.14 | 0.14 | 0.14 | 0.14  | 0.14 | 0.14  | 0.14  | 0.14 | 0.14 | 0.14 | 0.14 | 0.14 | 0.14 | 0.14 |
| butene                 | 67.2 | 67.2 | 67.2 | 67.2 | 67.2  | 67.2 | 67.2  | 67.2  | 67.2 | 67.2 | 67.2 | 67.2 | 67.2 | 67.2 | 67.2 |
| propene                | 33.6 | 33.6 | 33.6 | 33.6 | 33.6  | 33.6 | 33.6  | 33.6  | 33.6 | 33.6 | 33.6 | 33.6 | 33.6 | 33.6 | 33.6 |
| benzaldehyde           | 0.14 | 0.14 | 0.14 | 0.14 | 0.14  | 0.14 | 0.14  | 0.14  | 0.14 | 0.14 | 0.14 | 0.14 | 0.14 | 0.14 | 0.14 |

## S4 Global annual emission totals of the reference and sensitivity simulations for the 32 compounds

**Table S3.** Global annual emission totals ( $\text{Tg C yr}^{-1}$ ) of the 32 compounds averaged over the 12 years (2000-2012) for the reference CTRL, PFT-CLM4, PFT-JSBACH and TEST-NUDG simulations.

| Compounds              | CTRL  | PFT-CLM4 | PFT-JSBACH | TEST-NUDG |
|------------------------|-------|----------|------------|-----------|
| isoprene               | 417   | 381.7    | 304        | 409.3     |
| methanol               | 43.9  | 43.9     | 36.3       | 42.4      |
| $\alpha$ -pinene       | 26.1  | 45.7     | 37.1       | 25.3      |
| acetone                | 22.9  | 22.9     | 18.8       | 21.6      |
| ethene                 | 22.9  | 22.9     | 19.9       | 22        |
| $\beta$ -pinene        | 15.8  | 15.6     | 12.5       | 15        |
| t- $\beta$ -ocimene    | 14    | 10.5     | 8.4        | 13.8      |
| propene                | 12.7  | 12.7     | 10.9       | 11.8      |
| ethanol                | 8.8   | 8.8      | 7          | 8.5       |
| acetaldehyde           | 9.2   | 9.2      | 7.3        | 8.9       |
| limonene               | 8.4   | 9.5      | 7.4        | 8         |
| butene                 | 6.3   | 6.3      | 5.5        | 5.9       |
| 3-carene               | 6     | 6.1      | 5.1        | 5.7       |
| sabinene               | 5.7   | 6.3      | 5.2        | 5.5       |
| $\beta$ -caryophyllene | 4.3   | 4.3      | 3.4        | 4         |
| myrcene                | 2.3   | 5.9      | 4.9        | 2.2       |
| 232-MBO                | 2     | 1.7      | 1.3        | 1.9       |
| formaldehyde           | 1.7   | 1.7      | 1.4        | 1.6       |
| acetic acid            | 1.3   | 1.3      | 1          | 1.2       |
| toluene                | 1.3   | 1.3      | 1.1        | 1.2       |
| formic acid            | 0.8   | 0.8      | 0.7        | 0.8       |
| hydrogen cyanide       | 0.3   | 0.3      | 0.3        | 0.3       |
| ethane                 | 0.3   | 0.3      | 0.2        | 0.2       |
| methane                | 0.12  | 0.12     | 0.1        | 0.1       |
| methyl chloride        | 0.07  | 0.07     | 0.06       | 0.07      |
| dimethyl sulfide       | 0.04  | 0.04     | 0.03       | 0.03      |
| propane                | 0.03  | 0.03     | 0.02       | 0.02      |
| benzaldehyde           | 0.02  | 0.02     | 0.02       | 0.02      |
| methyl bromide         | 0.01  | 0.01     | 0.01       | 0.01      |
| methyl iodide          | 0.003 | 0.003    | 0.002      | 0.002     |
| carbon monoxide        | 41.1  | 41.1     | 35.7       | 40.4      |
| nitric oxide           | 5.9   | 3.6      | 3.4        | 5.4       |

## References

Guenther, A. B., Karl, T., Harley, P., Wiedinmyer, C., Palmer, P. I., and Geron, C.: Estimates of global terrestrial isoprene emissions using MEGAN (Model of Emissions of Gases and Aerosols from Nature), *Atmos. Chem. Phys.*, 6, 3181–3210, 2006.
